# Supplementary material
Source: Springer Nature journal article supplement (https://www.springermedizin.de/resource/supplementary/12974_2010_247_MOESM3_ESM.pdf/9601092)

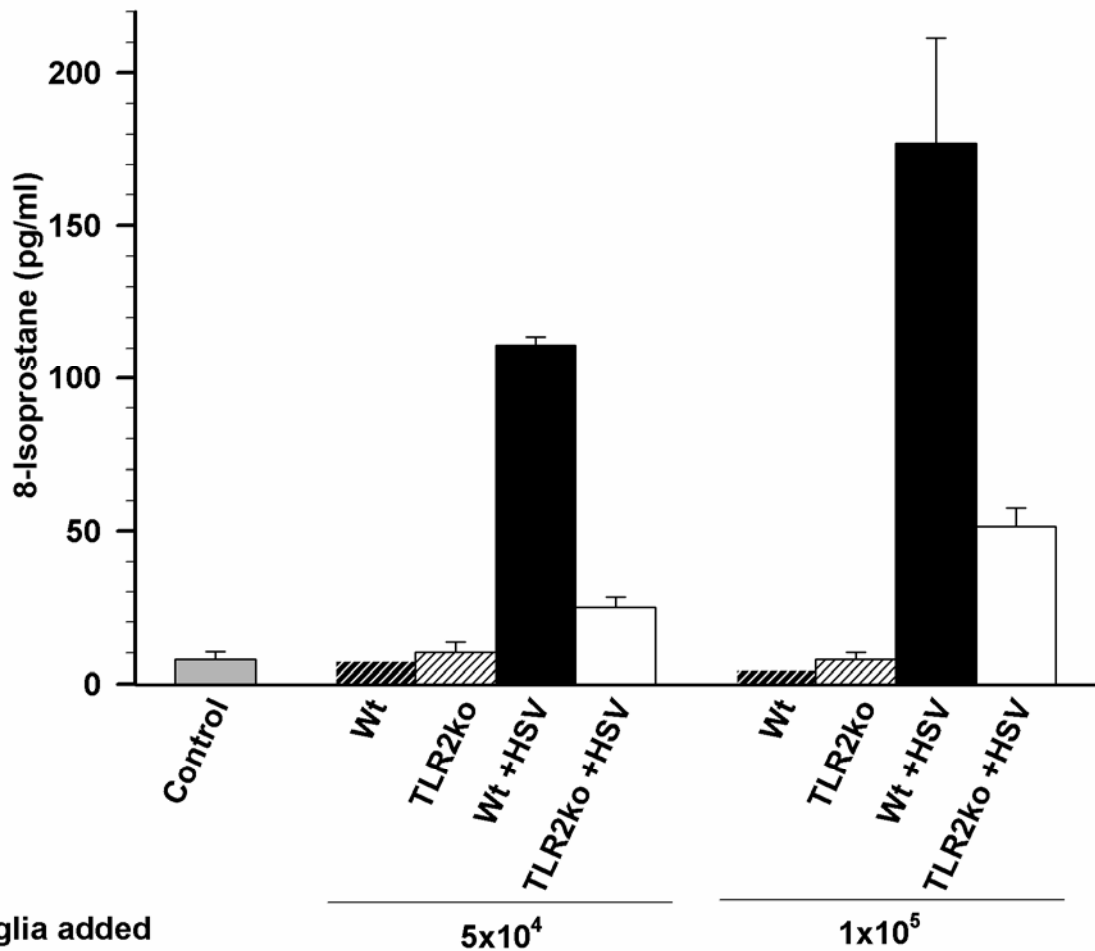

Microglia added

$5 \times 10^4$

$1 \times 10^5$

Supplement: MOESM3 [file 9601092]
